# Supplementary material for: COVID-19 and NSTEMI Outcomes among Hospitalized Patients in the United States and Racial Disparities in Mortality: Insight from National Inpatient Sample Database
Source: MDPI journal article supplement (doi:10.3390/vaccines10122024), 2022-11-26
Supplement: s1 [file s1]

| <b>Supplementary Table S1: ICD-10 codes.</b>                    |                                                                                                                                                                                                                                                                                       |
|-----------------------------------------------------------------|---------------------------------------------------------------------------------------------------------------------------------------------------------------------------------------------------------------------------------------------------------------------------------------|
| <b>Variable</b>                                                 | <b>ICD-10 CM code</b>                                                                                                                                                                                                                                                                 |
| NSTEMI                                                          | I21.4XX                                                                                                                                                                                                                                                                               |
| Covid                                                           | U071, U00, U49, U50, U85, J1282                                                                                                                                                                                                                                                       |
| Cardiogenic shock                                               | R570                                                                                                                                                                                                                                                                                  |
| Pericarditis                                                    | I24.1                                                                                                                                                                                                                                                                                 |
| A.fib                                                           | I48.0, I48.1, I48.91                                                                                                                                                                                                                                                                  |
| A.flutter                                                       | I48.3, I48.4, I48.92                                                                                                                                                                                                                                                                  |
| V.fib                                                           | I49.01, I49.02                                                                                                                                                                                                                                                                        |
| Vt                                                              | I47.2                                                                                                                                                                                                                                                                                 |
| Sinus brady                                                     | R00.1                                                                                                                                                                                                                                                                                 |
| First degree av block                                           | I44.0                                                                                                                                                                                                                                                                                 |
| Second degree av block                                          | I44.1                                                                                                                                                                                                                                                                                 |
| Third degree av block                                           | I44.2                                                                                                                                                                                                                                                                                 |
| Smoking                                                         | F17.XX, Z87.891                                                                                                                                                                                                                                                                       |
| CAD                                                             | I25.10, I25.11, I25.118, I25.119, I252, I253, I25.4XX, I25.5, I25.6, I25.8XX, I25.7XX, I25.9XX                                                                                                                                                                                        |
| CHF, HTN, DM, Renal failure, Chronic pulmonary disease, Obesity | Elixhauser comorbidities were used                                                                                                                                                                                                                                                    |
| <b>Variable</b>                                                 | <b>ICD-10 procedure code</b>                                                                                                                                                                                                                                                          |
| Intubation                                                      | 5A1945Z, 5A1955Z, 5A1935Z, 5A09357, 5A09457, 5A09557                                                                                                                                                                                                                                  |
| tPA use                                                         | 3E03317, 3E04317, 3E05317, 3E06317, 3E08317                                                                                                                                                                                                                                           |
| Vasopressor use                                                 | 3E030XZ, 3E033XZ, 3E040XZ, 3E043XZ, 3E050XZ, 3E053XZ, 3E060XZ, 3E063XZ                                                                                                                                                                                                                |
| CABG                                                            | 0210XX, 0211XX, 0212XX, 0213XX                                                                                                                                                                                                                                                        |
| PCI                                                             | 0203XX, 02704XX, 02713XX, 02714XX, 02723XX, 02724XX, 02733XX, 02734XX, 02C03XX, 02C04XX, 02C13XX, 02C14XX, 02C23XX, 02C24XX, 02C33XX, 02C34XX                                                                                                                                         |
| Coronary angiography                                            | B217XX, B218XX, B21FXX, B210XX, B211XX, B212XX, B213XX                                                                                                                                                                                                                                |
| IABP                                                            | 5A02210, 5A02110                                                                                                                                                                                                                                                                      |
| IMPELLA                                                         | 5A02116, 5A0211D, 5A02216, 5A0221D                                                                                                                                                                                                                                                    |
| Transvenous pacing                                              | 5A1223Z, 5A1213Z                                                                                                                                                                                                                                                                      |
| Pacemaker insertion                                             | 0J5604Z, 0JH605Z, 0JH606Z, 0JH60PZ, 0JH63PZ, 0JH80PZ, 0JH83PZ, 0JH634Z, 0JH804Z, 0JH834Z, 0JH635Z, 0JH805Z, 0JH835Z, 0JH636Z, 0JH806Z, 0JH836Z, 02H40NZ, 02H43NZ, 02H44NZ, 02H60NZ, 02H63NZ, 02H64NZ, 02H70NZ, 02H73NZ, 02H74NZ, 02HK0NZ, 02HK3NZ, 02HK4NZ, 02HL0NZ, 02HL3NZ, 02HL4NZ |
